# Supplementary material for: The diagnostic value of ADC histogram and direct ADC measurements for coexisting isocitrate dehydrogenase mutation and O6-methylguanine-DNA methyltransferase promoter methylation in glioma
Source: Front Neurosci. 2023 Jan 11;16:1099019. doi: 10.3389/fnins.2022.1099019 (PMC9875074; doi:10.3389/fnins.2022.1099019)
Supplement: Supplementary file 1 [file Table_1.DOCX]

Comparison of age, sex and pathological grade between 1.5T and 3T scanner group is shown in **Supplementary Table 1**. There was no statistically significant difference in age, sex and pathological grade between the two groups (*P*=0.278, 0.344 and 0.168).

Comparison of ADC histogram parameters and direct ADC values between 1.5T and 3T scanner group is shown in **Supplementary Table 2**. Minimum ADC and mean ADC obtained by direct measurements as well as the ADC histogram parameters including 10th percentile, 90th percentile, kurtosis, maximum, mean, median, minimum, root mean squared and skewness showed no statistically significant differences between the two groups.

**Supplementary Table 1** Comparison of age, sex and pathological grade between 3T and 1.5T scanner group.

| Demographics | 3T scanner, N=88 | 1.5T scanner, N=30 | *P* value |
| --- | --- | --- | --- |
| Age (years) | 52.63±11.54 | 55.37±12.92 | 0.278 |
| Sex (male, n (%)) | 44(50.0%) | 18(60.0%) | 0.344 |
| Grade, n (%) |  |  |  |
| Lower grade (II+III) | 39(44.3%) | 9(30.0%) | 0.168 |
| Glioblastoma (IV) | 49(55.7%) | 21(70.0%) |  |

**Supplementary Table 2** Comparison of ADC histogram parameters and minimum ADC and mean ADC between 3T and 1.5T scanner group.

| Variable# | 3T scanner, N=88 | 1.5T scanner, N=30 | *P* value |
| --- | --- | --- | --- |
| ADC histogram parameters |  |  |  |
| 10th percentile | 886.33±184.52 | 853.06±140.71 | 0.308 |
| 90th percentile | 1333.80±255.19 | 1366.58±212.34 | 0.528 |
| Entropy | 4.78(4.55, 5.11) | 5.01(4.80, 5.31) | 0.024* |
| Interquartile range | 218.50(180.75, 259.25) | 253.00(216.25, 319.00) | 0.026* |
| Kurtosis | 4.34(3.36, 5.52) | 4.45(3.74, 5.90) | 0.415 |
| Maximum | 2184.70±536.08 | 2395.52±451.07 | 0.056 |
| Mean absolute deviation | 141.65±49.17 | 162.66±48.11 | 0.044* |
| Mean | 1101.12±211.68 | 1095.10±162.59 | 0.887 |
| Median | 1085.97±219.44 | 1071.63±162.53 | 0.743 |
| Minimum | 491.82±208.07 | 424.00±207.16 | 0.125 |
| Range | 1692.89±641.03 | 1971.52±531.85 | 0.034* |
| Robust mean absolute deviation | 93.41(77.13, 110.17) | 107.11(91.35, 134.40) | 0.022* |
| Root mean squared | 1118.12±213.06 | 1116.64±165.17 | 0.972 |
| Skewness | 0.63±0.78 | 0.87±0.50 | 0.060 |
| Uniformity | 0.044(0.037, 0.052) | 0.039(0.030, 0.044) | 0.030* |
| Variance | 32616.09(21196.87, 53259.01) | 47858.58(31814.67, 63884.33) | 0.029* |
| Direct ADC measurements |  |  |  |
| Minimum ADC | 774.50(633.00, 998.25) | 748.00(665.25, 839.75) | 0.330 |
| Mean ADC | 927.17(790.08, 1129.67) | 910.50(827.92, 983.83) | 0.451 |

#: Continuous variables with normal distribution were described as mean and standard deviations, and continuous variables with skewed distribution were described as median and quartiles.

*: *P*<0.05
